# Supplementary material
Source: PubMed Central journal article supplement (PMC3966909)

# Supplemental Figure 1

## A

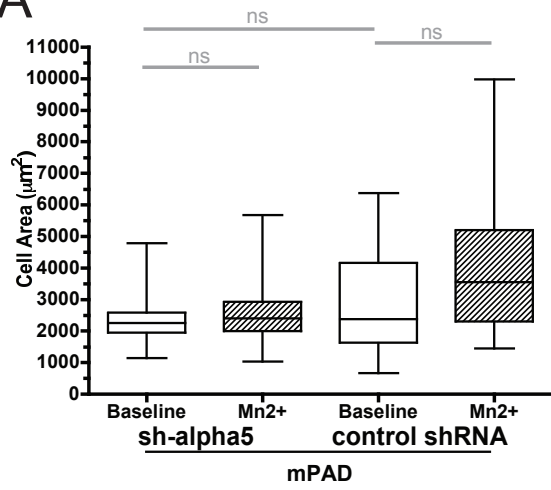

## B

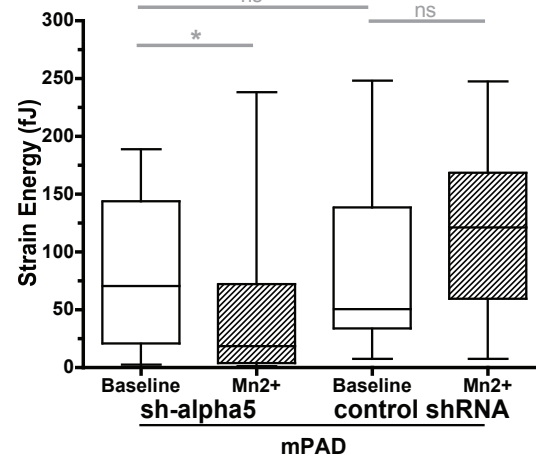

Supplement: NIHMS445472-supplement-02.pdf [file NIHMS445472-supplement-02.pdf]
